# Supplementary material for: Molecular Characterization of a Novel Splicing Mutation Underlying Mucopolysaccharidosis (MPS) Type VI—Indirect Proof of Principle on Its Pathogenicity
Source: PubMed Central journal article supplement (PMC7168280; doi:10.3390/diagnostics10020058), 2020-01-21
Supplement: diagnostics-10-00058-s001.pdf [file diagnostics-10-00058-s001.pdf]

**Table S1.** Primer sequences and PCR annealing temperatures for *ARSB* amplification.

| <i>ARSB gDNA amplification</i> |                            |                    |                            |
|--------------------------------|----------------------------|--------------------|----------------------------|
| Primer                         | Sequence (5'→3')           | Fragment Size (bp) | Annealing Temperature (°C) |
| <i>gARSB_prF</i>               | CTGTTTGCTAGTGGGGAGGA       | 595                | 60                         |
| <i>gARSB_prR</i>               | CCCCTTGTACCGCTGATAGA       |                    |                            |
| <i>gARSB_1F</i>                | GTTTCGTCTCTGGCTCCTCCT      | 686                | 58 <sup>#</sup>            |
| <i>gARSB_1R</i>                | GCCTGGAAGAGCGAGGTT         |                    |                            |
| <i>gARSB_2F</i>                | GAAGGCCATTTTATCTGCTTG      | 399                | 60                         |
| <i>gARSB_2R</i>                | AAAGCAGCCCCATTACAGTG       |                    |                            |
| <i>gARSB_3F</i>                | TAGCCTCGTCACGGGTAATC       | 382                | 60                         |
| <i>gARSB_3R</i>                | CAACAATGGCCTTTTCCTACA      |                    |                            |
| <i>gARSB_4F</i>                | TGCATTCTGTAGGTTGTCTTGA     | 471                | 60                         |
| <i>gARSB_4R</i>                | TCCACAATTACCATGTCTCCA      |                    |                            |
| <i>gARSB_5F</i>                | GGGAAAAGGCAAGGAATTTT       | 493                | 60                         |
| <i>gARSB_5R</i>                | TCATGTATTTGTAAGCTGAACTATCA |                    |                            |
| <i>gARSB_6F</i>                | TTCAAAGGGTCCCAGAATCA       | 496                | 60                         |
| <i>gARSB_6R</i>                | AGCACACTGCCCTCTGAGAT       |                    |                            |
| <i>gARSB_7F</i>                | TTGCGGTGGTTTATGACTGA       | 487                | 60                         |
| <i>gARSB_7R</i>                | GGTGGGAAACGGTTAGAACA       |                    |                            |
| <i>gARSB_8F</i>                | CCACACCCACAACCCAGT         | 500                | 60                         |
| <i>gARSB_8R</i>                | CCTCGGTGTGGTTTAAGAGC       |                    |                            |
| <i>ARSB cDNA amplification</i> |                            |                    |                            |
| Primer                         | Sequence (5'→3')           | Fragment Size (bp) | Annealing Temperature (°C) |
| <i>cARSB_1F</i>                | GCAGCCCAGTTCCTCATTCT       | 466                | 56                         |
| <i>cARSB_1R</i>                | GGCAGGAGTTTTTTCATCCAG      |                    |                            |
| <i>cARSB_2F</i>                | CTGCTCACTGGCCGCTA          | 587                | 60                         |
| <i>cARSB_2R</i>                | GTGTTGTTCCAGAGCCCACT       |                    |                            |
| <i>cARSB_3F</i>                | TCTCCAGTCTGTGCATGAGC       | 650                | 60                         |
| <i>cARSB_3R</i>                | GTGGAGGGAACCAAGTAACCA      |                    |                            |
| <i>cARSB_4F</i>                | GCTCCAGCAAAGGATGACTC       | 395                | 60                         |
| <i>cARSB_4R</i>                | GGTTTTCTAGCCTCCCTGAAA      |                    |                            |

<sup>#</sup>For some samples, the fragment amplified with this pair of primers may display considerable amounts of unspecific products. Therefore, 5% of betaine and/or 5%DMSO may be added to the reaction mix, whenever necessary.

**Table S2.** List of variants identified in the studied patient using the NGS-targeted panel.

| <i>Exonic Mutations</i> |                                    |                    |                                        |
|-------------------------|------------------------------------|--------------------|----------------------------------------|
| Gene Name               | Variant (RefSeq)                   | State <sup>1</sup> | Variant Characterization               |
| <i>ATP13A2</i>          | NM_022089:exon28:c.C3335G:p.T1112S | Het                | Not described                          |
| <i>MTX1</i>             | NM_002455:exon7:c.T1051C:p.F351L   | Het                | Not described as associated to disease |
| <i>CHIT1</i>            | NM_003465:exon5:c.C447T:p.A149A    | Het                | Not described as associated to disease |
| <i>IDUA</i>             | NM_000203:exon9:c.G1225C:p.G409R   | Het                | Described as pathogenic                |

|               |                                    |     |                                        |
|---------------|------------------------------------|-----|----------------------------------------|
| <i>GUSB</i>   | NM_000181:exon1:c.C162T:p.N54N     | Het | Described as non-pathogenic            |
| <i>PEX1</i>   | NM_000466:exon8:c.A1579G:p.T527A   | Het | Uncertain significance                 |
| <i>HGSNAT</i> | NM_152419:exon2:c.C204T:p.T68T     | Hom | Not described as associated to disease |
| <i>ABCA1</i>  | NM_005502:exon46:c.C6083T:p.A2028V |     | Not described as associated to disease |
| <i>ABCA1</i>  | NM_005502:exon39:c.T5301C:p.Y1767Y | Het | Described as non-pathogenic            |
| <i>MYO7A</i>  | NM_000260:exon39:c.T5356A:p.S1786T | Het | Described as non-pathogenic            |
| <i>MYO7A</i>  | NM_000260:exon39:c.A5381C:p.E1794A | Het | Not described                          |
| <i>CLN5</i>   | NM_006493:exon1:c.C234G:p.A78A     | Het | Described as non-pathogenic            |
| <i>GALC</i>   | NM_000153:exon13:c.C1403G:p.T468S  | Hom | Not described as associated to disease |
| <i>DYM</i>    | NM_017653:exon7:c.A526G:p.I176V    | Het | Described as non-pathogenic            |
| <i>IDS</i>    | NM_000202:exon6:c.C792T:p.Y264Y    | Het | Not described                          |

#### *Intronic Mutations*

| Gene Name      | Transcript ID and Variant                            | State <sup>1</sup> | Variant Characterization               |
|----------------|------------------------------------------------------|--------------------|----------------------------------------|
| <i>ATP13A2</i> | <u>ENST00000326735.13</u> :<br>c.1306+42_1306+43insC | Hom                | Not described as associated to disease |
| <i>SORT1</i>   | <u>ENST00000256637.8</u> : c.2141+53G>A              | Het                | Not described as associated to disease |
| <i>SFTPD</i>   | <u>ENST00000372292.8</u> : c.550+26G>T               | Het                | Not described as associated to disease |
| <i>ACP2</i>    | <u>ENST00000672073.1</u> : c.962+40G>A               | Het                | Not described as associated to disease |
| <i>ACP2</i>    | <u>ENST00000672073.1</u> : c.962+33G>A               | Het                | Not described as associated to disease |
| <i>NPC1</i>    | <u>ENST00000269228.10</u> : c.3246-20G>A             | Het                | Described as non-pathogenic            |
| <i>NPC1</i>    | <u>ENST00000269228.10</u> : c.220+52G>C              | Het                | Described as non-pathogenic            |

#### *UTR Region*

| Gene         | Variant (RefGene)  | State <sup>1</sup> | Variant Characterization               |
|--------------|--------------------|--------------------|----------------------------------------|
| <i>SUMF1</i> | NM_182760:c.*4C>T  | Het                | Not described as associated to disease |
| <i>PSAP</i>  | NM_002778:c.-29C>T | Het                | Described as non-pathogenic            |

<sup>1</sup> Homozgous (Hom) or Heterozygous (Het).

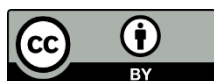

© 2020 by the authors. Submitted for possible open access publication under the terms and conditions of the Creative Commons Attribution (CC BY) license (<http://creativecommons.org/licenses/by/4.0/>).
